# Supplementary material
Source: publisher site journal article supplement (https://www.dovepress.com/article/400561)
Supplement: Supplementary file 1 [file get_supplementary_file.php]

**Supplementary Figure 1.** The flow chart of the patient enrollment.

**
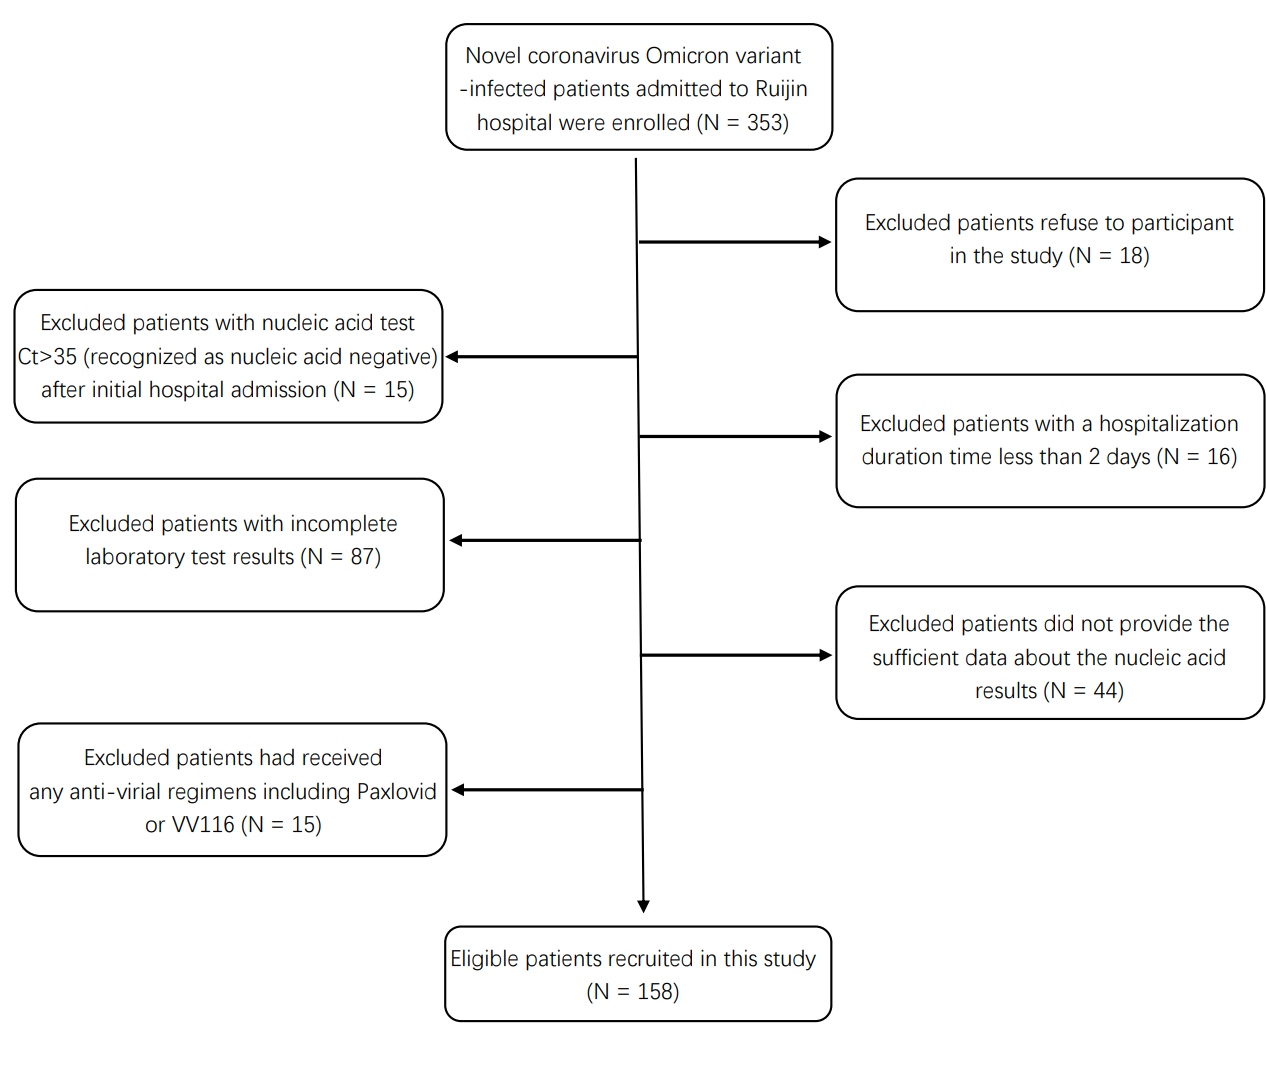
**

**Supplementary Figure 2.** Kaplan-Meier plot for duration time from infection to the nucleic acid negative conversion time and the plasma 25(OH)D level in COVID-19 patients with age > = 60 years old.

**
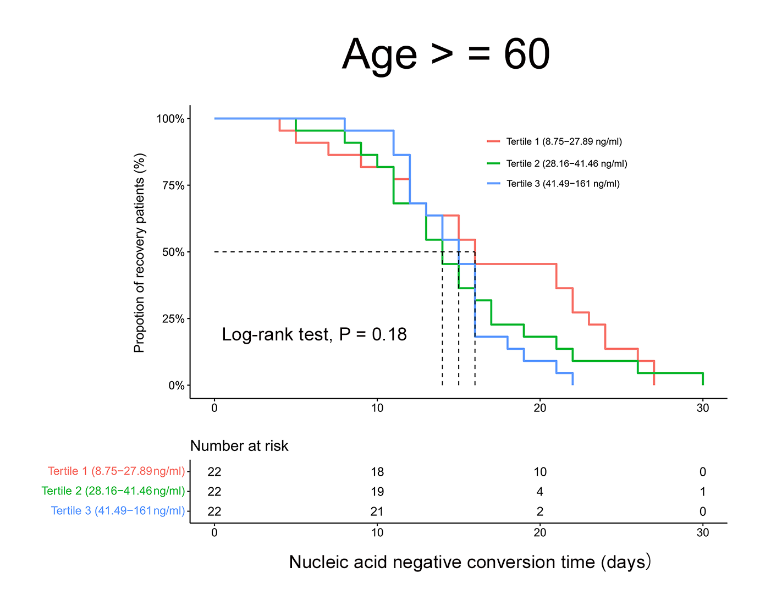
**

**Supplementary Table 1.** The types of Covid-19 vaccines received by participants.

| Types  of Covid-19 vaccines | N (%) |
| --- | --- |
| Sinopharm / BIBP (Beijing Institute of Biological Products Co., Ltd) | 103 (55.38%) |
| sinovac (Sinovac Life Sciences Co., Ltd) | 63 (33.87%) |
| Sinopharm / WIBP (Wuhan Institute of Biological Products Co., Ltd) | 10 (5.38%) |
| CanSinoBio (CanSino Biologics Inc) | 5 (2.69%) |
| Zhifei Longcom, China (Anhui Zhifei Longcom Biopharmaceutical) | 5 (2.69%) |
| Total | 186 |

**Supplementary Table 2.** The univariate Cox proportional hazard regression analysis of nucleic acid negative conversion time in COVID-19 patients (N = 158, P > = 0.05)

| Variable | Duration time of virus infection to nucleic acid negative conversion | |
| --- | --- | --- |
|  | HR (95% CI) | P |
| WBC#, ×109/L (≥5.5 vs. <5.5) | 1.35 (0.98-1.87) | 0.066 |
| PLT#, ×109/L (>200 vs. ≤200) | 1.12 (0.81-1.54) | 0.487 |
| MPV, fL (>10 vs. ≤10) | 0.75 (0.55-1.04) | 0.083 |
| MONO% (>7.3 vs. ≤7.3) | 0.75 (0.55-1.03) | 0.071 |
| MONO#, ×109/L (>0.4 vs. ≤0.4) | 1.18 (0.86-1.62) | 0.297 |
| MCHC, g/L (≥344 vs. <344) | 0.94 (0.69-1.29) | 0.721 |
| MCV, fL (≥89.4 vs. <89.4) | 0.84 (0.61-1.15) | 0.273 |
| MCH, pg (≥30.8 vs. <30.8) | 0.79 (0.58-1.09) | 0.154 |
| LYMPH#, ×109/L (≥1.59 vs. <1.59) | 0.87 (0.64-1.19) | 0.391 |
| EO#,×109/L (≥0.09 vs. <0.09) | 1.13 (0.83-1.56) | 0.439 |
| EO% (≥1.5 vs. <1.5) | 0.84 (0.61-1.15) | 0.277 |
| BASO% (≥0.4 vs. <0.4) | 0.97 (0.71-1.33) | 0.849 |
| BASO#, ×109/L (≥0.03 vs. <0.03) | 1.12 (0.79-1.59) | 0.510 |
| ALP, U/L (≥79 vs. <79) | 1.02 (0.74-1.39) | 0.908 |
| ALT, U/L (≥22 vs. <22) | 0.87(0.64-1.19) | 0.383 |
| AST, U/L (≥21 vs. <21) | 1.01 (0.74-1.38) | 0.959 |
| UREA, mmol/L (≥4.8 vs. <4.8) | 1.15 (0.84-1.57) | 0.395 |
| CREA, μmol/L (≥78 vs. <78) | 0.88 (0.65-1.21) | 0.441 |
| DBIL, μmol/L (≥2.3 vs. <2.3) | 0.91 (0.67-1.25) | 0.569 |
| GGT, U/L (≥24 vs. <24) | 1.03 (0.75-1.41) | 0.850 |
| TBIL, μmol/L (≥12.8 vs. <12.8) | 0.94 (0.68-1.28) | 0.681 |
| TP, g/L (≥68 vs. <68) | 0.81 (0.59-1.11) | 0.184 |
| TBA, μmol/L (≥4.3 vs. <4.3) | 1.01 (0.74-1.39) | 0.938 |
| UA, μmol/L (≥331.9 vs. <331.9) | 1.29 (0.94-1.78) | 0.114 |
| PA, g/L (≥207 vs. <207) | 0.85 (0.62-1.17) | 0.319 |
| ADA, U/L (≥12 vs. <12) | 0.84 (0.61-1.16) | 0.288 |
| eGFR, mL/min (≥87.9 vs. <87.9) | 1.35 (0.98-1.86) | 0.064 |
| CG, mg/L (≥1.8 vs. <1.8) | 1.04(0.75-1.42) | 0.831 |
| Cystatin C, mg/L (≥0.9 vs. <0.9) | 1.15 (0.84-1.58) | 0.385 |
| Sex (Female vs. Male) | 0.77 (0.56-1.06) | 0.113 |
| Vaccination status |  | 0.872 |
| 0 | Reference |  |
| 1 | 0.87 (0.60-1.27) | 0.473 |
| 2 | 1.20 (0.37-3.85) | 0.765 |
| 3 | 0.93 (0.61-1.40) | 0.716 |
